# Supplementary material
Source: HighWire-hosted journal article supplement (https://fmch.bmj.com/content/11/2/e001972)
Supplement: inline-supplementary-material-1 [file inline-supplementary-material-1.pdf]

## APPENDIX

**Appendix Table 1. Recorded country of birth among non-US-born Latino patients, stratified by sex and language preference**

| Country            | Group, N (row %) |                |                     |                |                         |
|--------------------|------------------|----------------|---------------------|----------------|-------------------------|
|                    | Sex              |                | Language preference |                | Row total<br>(column %) |
|                    | Female           | Male           | English             | Spanish        |                         |
| Total Non-US-born  | 50,704 (62.6%)   | 30,301 (37.4%) | 8,953 (11.1%)       | 72,052 (88.9%) | 81,005 (100%)           |
| Argentina          | 69 (52.3%)       | 63 (47.7%)     | 48 (36.4%)          | 84 (63.6%)     | 132 (0.2%)              |
| Bolivia            | 27 (61.4%)       | 17 (38.6%)     | 19 (43.2%)          | 25 (56.8%)     | 44 (0.05%)              |
| Brazil             | 93 (57.8%)       | 68 (42.2%)     | 142 (88.2%)         | 19 (11.8%)     | 161 (0.2%)              |
| Chile              | 72 (60.5%)       | 47 (39.5%)     | 49 (41.2%)          | 70 (58.8%)     | 119 (0.1%)              |
| Colombia           | 505 (65.8%)      | 263 (34.2%)    | 171 (22.3%)         | 597 (77.7%)    | 768 (0.9%)              |
| Costa Rica         | 68 (58.1%)       | 49 (41.9%)     | 49 (41.9%)          | 68 (58.1%)     | 117 (0.1%)              |
| Cuba               | 637 (33.6%)      | 1,260 (66.4%)  | 149 (7.9%)          | 1,748 (92.1%)  | 1,897 (2.3%)            |
| Dominican Republic | 6,024 (60.5%)    | 3,937 (39.5%)  | 1,362 (13.7%)       | 8,599 (86.3%)  | 9,961 (12.3%)           |
| Ecuador            | 799 (54.8%)      | 660 (45.2%)    | 186 (12.7%)         | 1,273 (87.3%)  | 1,459 (1.8%)            |
| El Salvador        | 7,184 (67.1%)    | 3,515 (32.9%)  | 779 (7.3%)          | 9,920 (92.7%)  | 10,699 (13.2%)          |
| Guatemala          | 7,723 (55.1%)    | 6,294 (44.9%)  | 673 (4.8%)          | 13,344 (95.2%) | 14,017 (17.3%)          |
| Honduras           | 3,299 (74.4%)    | 1,136 (25.6%)  | 322 (7.3%)          | 4,113 (92.7%)  | 4,435 (5.5%)            |
| Mexico             | 23,073 (65.2%)   | 12,342 (34.8%) | 4,570 (12.9%)       | 30,845 (87.1%) | 35,415 (43.7%)          |
| Nicaragua          | 341 (66.7%)      | 170 (33.3%)    | 75 (14.7%)          | 436 (85.3%)    | 511 (0.6%)              |
| Panama             | 48 (64.9%)       | 26 (35.1%)     | 31 (41.9%)          | 43 (58.1%)     | 74 (0.1%)               |
| Peru               | 362 (59.7%)      | 244 (40.3%)    | 149 (24.6%)         | 457 (75.4%)    | 606 (0.7%)              |
| Philippines        | 28 (65.1%)       | 15 (34.9%)     | 43 (100.0%)         | 0 (0.0%)       | 43 (0.05%)              |
| Spain              | 38 (61.3%)       | 24 (38.7%)     | 19 (30.6%)          | 43 (69.4%)     | 62 (0.1%)               |
| Venezuela          | 265 (64.3%)      | 147 (35.7%)    | 74 (18.0%)          | 338 (82.0%)    | 412 (0.5%)              |
| Other <sup>a</sup> | 49 (67.1%)       | 24 (32.9%)     | 43 (58.9%)          | 30 (41.1%)     | 73 (0.1%)               |

<sup>a</sup>Other countries with lower than 0.05% Non-US-born Latino include Belize, Paraguay, and Uruguay. These tables have 422 fewer patients than in Table 1 as we excluded low prevalence countries outside of the Americas.

**Appendix Table 2. Recorded country of birth among non-US-born Latino patients, stratified by age at the first visit**

| Country            | Age at the first visit, N (row %) |               |                |                |                |              |
|--------------------|-----------------------------------|---------------|----------------|----------------|----------------|--------------|
|                    | 9-13                              | 14-18         | 19-30          | 31-50          | 51-65          | 66-79        |
| Total Non-US-born  | 1,999 (2.5%)                      | 4,482 (5.5%)  | 16,071 (19.8%) | 36,667 (45.3%) | 17,495 (21.6%) | 4,291 (5.3%) |
| Argentina          | 1 (0.8%)                          | 6 (4.5%)      | 21 (15.9%)     | 64 (48.5%)     | 33 (25.0%)     | 7 (5.3%)     |
| Bolivia            | 0 (0.0%)                          | 1 (2.3%)      | 7 (15.9%)      | 16 (36.4%)     | 15 (34.1%)     | 5 (11.4%)    |
| Brazil             | 4 (2.5%)                          | 5 (3.1%)      | 54 (33.5%)     | 80 (49.7%)     | 16 (9.9%)      | 2 (1.2%)     |
| Chile              | 0 (0.0%)                          | 6 (5.0%)      | 14 (11.8%)     | 51 (42.9%)     | 34 (28.6%)     | 14 (11.8%)   |
| Colombia           | 28 (3.6%)                         | 40 (5.2%)     | 161 (21.0%)    | 294 (38.3%)    | 186 (24.2%)    | 59 (7.7%)    |
| Costa Rica         | 3 (2.6%)                          | 8 (6.8%)      | 15 (12.8%)     | 40 (34.2%)     | 34 (29.1%)     | 17 (14.5%)   |
| Cuba               | 53 (2.8%)                         | 84 (4.4%)     | 515 (27.1%)    | 939 (49.5%)    | 257 (13.5%)    | 49 (2.6%)    |
| Dominican Republic | 438 (4.4%)                        | 685 (6.9%)    | 2,130 (21.4%)  | 3,487 (35.0%)  | 2,243 (22.5%)  | 978 (9.8%)   |
| Ecuador            | 34 (2.3%)                         | 78 (5.3%)     | 368 (25.2%)    | 710 (48.7%)    | 207 (14.2%)    | 62 (4.2%)    |
| El Salvador        | 268 (2.5%)                        | 623 (5.8%)    | 1,624 (15.2%)  | 4,019 (37.6%)  | 3,376 (31.6%)  | 789 (7.4%)   |
| Guatemala          | 385 (2.7%)                        | 1,434 (10.2%) | 3,887 (27.7%)  | 5,685 (40.6%)  | 2,175 (15.5%)  | 451 (3.2%)   |
| Honduras           | 249 (5.6%)                        | 412 (9.3%)    | 1,293 (29.2%)  | 1,804 (40.7%)  | 573 (12.9%)    | 104 (2.3%)   |
| Mexico             | 494 (1.4%)                        | 1,038 (2.9%)  | 5,719 (16.1%)  | 18,751 (52.9%) | 7,823 (22.1%)  | 1,590 (4.5%) |
| Nicaragua          | 10 (2.0%)                         | 16 (3.1%)     | 64 (12.5%)     | 226 (44.2%)    | 157 (30.7%)    | 38 (7.4%)    |
| Panama             | 3 (4.1%)                          | 4 (5.4%)      | 9 (12.2%)      | 26 (35.1%)     | 22 (29.7%)     | 10 (13.5%)   |
| Peru               | 6 (1.0%)                          | 11 (1.8%)     | 78 (12.9%)     | 221 (36.5%)    | 233 (38.4%)    | 57 (9.4%)    |
| Philippines        | 1 (2.3%)                          | 2 (4.7%)      | 4 (9.3%)       | 21 (48.8%)     | 9 (20.9%)      | 6 (14.0%)    |
| Spain              | 5 (8.1%)                          | 7 (11.3%)     | 9 (14.5%)      | 28 (45.2%)     | 10 (16.1%)     | 3 (4.8%)     |
| Venezuela          | 16 (3.9%)                         | 20 (4.9%)     | 85 (20.6%)     | 175 (42.5%)    | 70 (17.0%)     | 46 (11.2%)   |
| Other <sup>a</sup> | 1 (1.4%)                          | 2 (2.7%)      | 14 (19.2%)     | 30 (41.1%)     | 22 (30.1%)     | 4 (5.5%)     |

<sup>a</sup>Other countries with lower than 0.05% Non-US-born Latino include Belize, Paraguay, and Uruguay. These tables have 422 fewer patients than in Table 1 as we excluded low prevalence countries outside of the Americas.

**Appendix Table 3. Recorded country of birth among Latino patients, stratified by federal poverty level**

| Country            | Federal Poverty Level, N (row %) |                             |                  |                |
|--------------------|----------------------------------|-----------------------------|------------------|----------------|
|                    | Above & Below 138                | Always Equal to or Over 138 | Always Under 138 | Never Reported |
| Total Non-US-born  | 8,204 (10.1%)                    | 4,139 (5.1%)                | 62,301 (76.9%)   | 6,361 (7.9%)   |
| Argentina          | 21 (15.9%)                       | 6 (4.5%)                    | 85 (64.4%)       | 20 (15.2%)     |
| Bolivia            | 3 (6.8%)                         | 1 (2.3%)                    | 28 (63.6%)       | 12 (27.3%)     |
| Brazil             | 16 (9.9%)                        | 30 (18.6%)                  | 98 (60.9%)       | 17 (10.6%)     |
| Chile              | 9 (7.6%)                         | 10 (8.4%)                   | 84 (70.6%)       | 16 (13.4%)     |
| Colombia           | 59 (7.7%)                        | 62 (8.1%)                   | 559 (72.8%)      | 88 (11.5%)     |
| Costa Rica         | 8 (6.8%)                         | 13 (11.1%)                  | 77 (65.8%)       | 19 (16.2%)     |
| Cuba               | 303 (16.0%)                      | 48 (2.5%)                   | 1,448 (76.3%)    | 98 (5.2%)      |
| Dominican Republic | 933 (9.4%)                       | 639 (6.4%)                  | 7,280 (73.1%)    | 1,109 (11.1%)  |
| Ecuador            | 203 (13.9%)                      | 213 (14.6%)                 | 875 (60.0%)      | 168 (11.5%)    |
| El Salvador        | 997 (9.3%)                       | 452 (4.2%)                  | 8,792 (82.2%)    | 458 (4.3%)     |
| Guatemala          | 1,009 (7.2%)                     | 459 (3.3%)                  | 12,058 (86.0%)   | 491 (3.5%)     |
| Honduras           | 321 (7.2%)                       | 200 (4.5%)                  | 3,679 (83.0%)    | 235 (5.3%)     |
| Mexico             | 4,166 (11.8%)                    | 1,881 (5.3%)                | 25,946 (73.3%)   | 3,422 (9.7%)   |
| Nicaragua          | 47 (9.2%)                        | 24 (4.7%)                   | 387 (75.7%)      | 53 (10.4%)     |
| Panama             | 10 (13.5%)                       | 5 (6.8%)                    | 50 (67.6%)       | 9 (12.2%)      |
| Peru               | 48 (7.9%)                        | 43 (7.1%)                   | 430 (71.0%)      | 85 (14.0%)     |
| Philippines        | 7 (16.3%)                        | 1 (2.3%)                    | 27 (62.8%)       | 8 (18.6%)      |
| Spain              | 3 (4.8%)                         | 7 (11.3%)                   | 46 (74.2%)       | 6 (9.7%)       |
| Venezuela          | 36 (8.7%)                        | 36 (8.7%)                   | 299 (72.6%)      | 41 (10.0%)     |
| Other <sup>a</sup> | 5 (6.8%)                         | 9 (12.3%)                   | 53 (72.6%)       | 6 (8.2%)       |

<sup>a</sup>Other countries with lower than 0.05% Non-US-born Latino include Belize, Paraguay, and Uruguay. These tables have 422 fewer patients than in Table 1 as we excluded low prevalence countries outside of the Americas.

**Appendix Table 4. Recorded country of birth among Latino patients, stratified by insurance types**

| Country            | Insurance, N (row %) |               |                         |                |
|--------------------|----------------------|---------------|-------------------------|----------------|
|                    | Never Insured        | Some Private  | Some Private and Public | Some Public    |
| Total Non-US-born  | 11,794 (14.6%)       | 7,023 (8.7%)  | 13,889 (17.1%)          | 48,299 (59.6%) |
| Argentina          | 23 (17.4%)           | 11 (8.3%)     | 20 (15.2%)              | 78 (59.1%)     |
| Bolivia            | 3 (6.8%)             | 8 (18.2%)     | 4 (9.1%)                | 29 (65.9%)     |
| Brazil             | 37 (23.0%)           | 29 (18.0%)    | 17 (10.6%)              | 78 (48.4%)     |
| Chile              | 22 (18.5%)           | 24 (20.2%)    | 19 (16.0%)              | 54 (45.4%)     |
| Colombia           | 150 (19.5%)          | 153 (19.9%)   | 118 (15.4%)             | 347 (45.2%)    |
| Costa Rica         | 20 (17.1%)           | 11 (9.4%)     | 23 (19.7%)              | 63 (53.8%)     |
| Cuba               | 98 (5.2%)            | 69 (3.6%)     | 138 (7.3%)              | 1,592 (83.9%)  |
| Dominican Republic | 508 (5.1%)           | 1,141 (11.5%) | 3,042 (30.5%)           | 5,270 (52.9%)  |
| Ecuador            | 709 (48.6%)          | 132 (9.0%)    | 77 (5.3%)               | 541 (37.1%)    |
| El Salvador        | 1,054 (9.9%)         | 869 (8.1%)    | 1,516 (14.2%)           | 7,260 (67.9%)  |
| Guatemala          | 1,167 (8.3%)         | 790 (5.6%)    | 2,830 (20.2%)           | 9,230 (65.8%)  |
| Honduras           | 884 (19.9%)          | 464 (10.5%)   | 682 (15.4%)             | 2,405 (54.2%)  |
| Mexico             | 6,797 (19.2%)        | 3,111 (8.8%)  | 5,141 (14.5%)           | 20,366 (57.5%) |
| Nicaragua          | 51 (10.0%)           | 40 (7.8%)     | 62 (12.1%)              | 358 (70.1%)    |
| Panama             | 8 (10.8%)            | 10 (13.5%)    | 18 (24.3%)              | 38 (51.4%)     |
| Peru               | 101 (16.7%)          | 82 (13.5%)    | 110 (18.2%)             | 313 (51.7%)    |
| Philippines        | 5 (11.6%)            | 4 (9.3%)      | 6 (14.0%)               | 28 (65.1%)     |
| Spain              | 8 (12.9%)            | 7 (11.3%)     | 9 (14.5%)               | 38 (61.3%)     |
| Venezuela          | 142 (34.5%)          | 59 (14.3%)    | 42 (10.2%)              | 169 (41.0%)    |
| Other <sup>a</sup> | 7 (9.6%)             | 9 (12.3%)     | 15 (20.5%)              | 42 (57.5%)     |

<sup>a</sup>Other countries with lower than 0.05% Non-US-born Latino include Belize, Paraguay, and Uruguay. These tables have 422 fewer patients than in Table 1 as we excluded low prevalence countries outside of the Americas.

**Appendix Table 5. Recorded country of birth among Latino patients, stratified by annual visit rates**

| Country            | Annual visit rate, N (row %) |                |                |                |
|--------------------|------------------------------|----------------|----------------|----------------|
|                    | 0-1                          | 2-3            | 4-5            | >5             |
| Total Non-US-born  | 18,514 (22.9%)               | 25,942 (32.0%) | 15,333 (18.9%) | 21,216 (26.2%) |
| Argentina          | 35 (26.5%)                   | 49 (37.1%)     | 23 (17.4%)     | 25 (18.9%)     |
| Bolivia            | 12 (27.3%)                   | 15 (34.1%)     | 7 (15.9%)      | 10 (22.7%)     |
| Brazil             | 59 (36.6%)                   | 49 (30.4%)     | 26 (16.1%)     | 27 (16.8%)     |
| Chile              | 32 (26.9%)                   | 46 (38.7%)     | 15 (12.6%)     | 26 (21.8%)     |
| Colombia           | 178 (23.2%)                  | 235 (30.6%)    | 121 (15.8%)    | 234 (30.5%)    |
| Costa Rica         | 23 (19.7%)                   | 44 (37.6%)     | 25 (21.4%)     | 25 (21.4%)     |
| Cuba               | 726 (38.3%)                  | 795 (41.9%)    | 174 (9.2%)     | 202 (10.6%)    |
| Dominican Republic | 1,332 (13.4%)                | 2,816 (28.3%)  | 2,029 (20.4%)  | 3,784 (38.0%)  |
| Ecuador            | 386 (26.5%)                  | 523 (35.8%)    | 206 (14.1%)    | 344 (23.6%)    |
| El Salvador        | 2,482 (23.2%)                | 3,328 (31.1%)  | 2,084 (19.5%)  | 2,805 (26.2%)  |
| Guatemala          | 2,814 (20.1%)                | 4,483 (32.0%)  | 2,784 (19.9%)  | 3,936 (28.1%)  |
| Honduras           | 1,039 (23.4%)                | 1,355 (30.6%)  | 850 (19.2%)    | 1,191 (26.9%)  |
| Mexico             | 9,008 (25.4%)                | 11,665 (32.9%) | 6,646 (18.8%)  | 8,096 (22.9%)  |
| Nicaragua          | 97 (19.0%)                   | 172 (33.7%)    | 106 (20.7%)    | 136 (26.6%)    |
| Panama             | 16 (21.6%)                   | 27 (36.5%)     | 14 (18.9%)     | 17 (23.0%)     |
| Peru               | 123 (20.3%)                  | 156 (25.7%)    | 127 (21.0%)    | 200 (33.0%)    |
| Philippines        | 10 (23.3%)                   | 20 (46.5%)     | 10 (23.3%)     | 3 (7.0%)       |
| Spain              | 13 (21.0%)                   | 16 (25.8%)     | 11 (17.7%)     | 22 (35.5%)     |
| Venezuela          | 115 (27.9%)                  | 119 (28.9%)    | 60 (14.6%)     | 118 (28.6%)    |
| Other <sup>a</sup> | 14 (19.2%)                   | 29 (39.7%)     | 15 (20.5%)     | 15 (20.5%)     |

<sup>a</sup>Other countries with lower than 0.05% Non-US-born Latino include Belize, Paraguay, and Uruguay. These tables have 422 fewer patients than in Table 1 as we excluded low prevalence countries outside of the Americas.

**Appendix Table 6. Recorded country of birth among Latino patients, stratified by cardiovascular disease and risk factor diagnosis**

| Country            | Patients with positive diagnosis, N (% of total non-US-born by country) |                |                |                |                |
|--------------------|-------------------------------------------------------------------------|----------------|----------------|----------------|----------------|
|                    | Heart Disease                                                           | Obesity        | Diabetes       | Hypertension   | Hyperlipidemia |
| Total Non-US-born  | 896 (1.1%)                                                              | 38,556 (48.1%) | 11,946 (14.9%) | 15,319 (19.1%) | 20,092 (25.0%) |
| Argentina          | 3 (2.3%)                                                                | 47 (35.6%)     | 11 (8.3%)      | 23 (17.4%)     | 28 (21.2%)     |
| Bolivia            | 1 (2.3%)                                                                | 18 (40.9%)     | 9 (20.5%)      | 7 (15.9%)      | 13 (29.5%)     |
| Brazil             | 0 (0.0%)                                                                | 41 (25.5%)     | 5 (3.1%)       | 7 (4.3%)       | 17 (10.6%)     |
| Chile              | 0 (0.0%)                                                                | 48 (40.3%)     | 9 (7.6%)       | 22 (18.5%)     | 30 (25.2%)     |
| Cambodia           | 1 (16.7%)                                                               | 3 (50.0%)      | 0 (0.0%)       | 3 (50.0%)      | 1 (16.7%)      |
| Costa Rica         | 3 (2.6%)                                                                | 43 (36.8%)     | 18 (15.4%)     | 37 (31.6%)     | 35 (29.9%)     |
| Cuba               | 26 (1.4%)                                                               | 617 (32.5%)    | 111 (5.9%)     | 291 (15.3%)    | 241 (12.7%)    |
| Dominican Republic | 189 (1.9%)                                                              | 4,923 (49.4%)  | 1,460 (14.7%)  | 2,785 (28.0%)  | 2,347 (23.6%)  |
| Ecuador            | 7 (0.5%)                                                                | 478 (32.8%)    | 70 (4.8%)      | 99 (6.8%)      | 179 (12.3%)    |
| El Salvador        | 153 (1.4%)                                                              | 5,494 (51.4%)  | 1,851 (17.3%)  | 2,775 (25.9%)  | 3,252 (30.4%)  |
| Guatemala          | 103 (0.7%)                                                              | 6,250 (44.6%)  | 1,623 (11.6%)  | 1,730 (12.3%)  | 3,232 (23.1%)  |
| Honduras           | 24 (0.5%)                                                               | 2,106 (47.5%)  | 340 (7.7%)     | 549 (12.4%)    | 687 (15.5%)    |
| Mexico             | 364 (1.0%)                                                              | 17,776 (50.2%) | 6,257 (17.7%)  | 6,652 (18.8%)  | 9,592 (27.1%)  |
| Nicaragua          | 11 (2.2%)                                                               | 242 (47.4%)    | 73 (14.3%)     | 120 (23.5%)    | 157 (30.7%)    |
| Panama             | 2 (2.7%)                                                                | 32 (43.2%)     | 8 (10.8%)      | 20 (27.0%)     | 15 (20.3%)     |
| Peru               | 4 (0.7%)                                                                | 234 (38.6%)    | 61 (10.1%)     | 110 (18.2%)    | 179 (29.5%)    |
| Philippines        | 1 (2.3%)                                                                | 2 (4.7%)       | 7 (16.3%)      | 10 (23.3%)     | 16 (37.2%)     |
| Spain              | 1 (1.6%)                                                                | 24 (38.7%)     | 11 (17.7%)     | 11 (17.7%)     | 11 (17.7%)     |
| Venezuela          | 3 (0.7%)                                                                | 145 (35.2%)    | 16 (3.9%)      | 55 (13.3%)     | 47 (11.4%)     |
| Other <sup>a</sup> | 0 (0%)                                                                  | 33 (46.5%)     | 6 (8.5%)       | 13 (18.3%)     | 13 (18.3%)     |

<sup>a</sup>Other countries with lower than 0.05% Non-US-born Latino include Belize, Paraguay, and Uruguay. These tables have 422 fewer patients than in Table 1 as we excluded low prevalence countries outside of the Americas.

**Appendix Table 7. Unadjusted and covariate-adjusted Prevalence of Heart Disease and cardiovascular disease risk factor diagnosis among Latinos with/without a place of birth reported and by Latin Country of Birth**

|                                     | Heart Disease |                   | Obesity    |                      | Diabetes   |                      | Hypertension |                      | Hyperlipidemia |                      |
|-------------------------------------|---------------|-------------------|------------|----------------------|------------|----------------------|--------------|----------------------|----------------|----------------------|
|                                     | Crude Rate    | Adjusted Rate     | Crude Rate | Adjusted Rate        | Crude Rate | Adjusted Rate        | Crude Rate   | Adjusted Rate        | Crude Rate     | Adjusted Rate        |
| <b>Overall</b>                      | 1.0           | 1.0<br>(0.9, 1.1) | 45.6       | 45.6<br>(45.0, 46.3) | 10.5       | 10.5<br>(10.1, 10.9) | 13.8         | 13.8<br>(13.4, 14.3) | 15.5           | 15.5<br>(14.9, 16.2) |
| <b>By place of birth reported</b>   |               |                   |            |                      |            |                      |              |                      |                |                      |
| Non-US-born Latino                  | 1.1           | 0.8<br>(0.7, 0.9) | 47.8       | 42.3<br>(40.3, 44.4) | 14.8       | 10.3<br>(9.4, 11.2)  | 19.0         | 13.5<br>(12.4, 14.6) | 24.9           | 17.7<br>(15.7, 19.6) |
| US-born Latino                      | 0.9           | 1.1<br>(1.0, 1.3) | 45.6       | 46.3<br>(44.7, 47.9) | 7.5        | 11.3<br>(10.5, 12.0) | 11.5         | 15.6<br>(14.6, 16.6) | 13.4           | 18.3<br>(16.7, 20.0) |
| Latino place of birth not collected | 1.0           | 1.0<br>(0.9, 1.1) | 45.4       | 45.9<br>(45.3, 46.6) | 10.3       | 10.5<br>(10.1, 10.9) | 13.4         | 13.8<br>(13.3, 14.3) | 14.7           | 15.1<br>(14.4, 15.8) |
| P-values                            |               | <0.001            |            | <0.001               |            | 0.06                 |              | <0.001               |                | <0.001               |
| <b>By Non-US-born country</b>       |               |                   |            |                      |            |                      |              |                      |                |                      |
| Mexico<br>(N=35,415)                | 1.0           | 1.2<br>(1.0, 1.4) | 50.2       | 50.4<br>(48.2, 52.6) | 17.7       | 18.1<br>(16.7, 19.4) | 18.8         | 19.5<br>(17.4, 21.6) | 27.1           | 27.5<br>(24.2, 30.9) |
| Guatemala<br>(N=14,017)             | 0.7           | 1.1<br>(0.9, 1.3) | 44.6       | 45.7<br>(43.6, 47.8) | 11.6       | 14.0<br>(12.2, 15.8) | 12.3         | 15.7<br>(13.4, 17.9) | 23.1           | 26.1<br>(23.7, 28.5) |
| El Salvador<br>(N=10,699)           | 1.4           | 1.2<br>(1.0, 1.5) | 51.4       | 50.8<br>(48.5, 53.1) | 17.3       | 14.6<br>(13.3, 15.9) | 25.9         | 21.1<br>(19.9, 22.3) | 30.4           | 26.9<br>(24.7, 29.1) |
| Dominican Republic<br>(N=9,961)     | 1.9           | 1.5<br>(1.2, 1.7) | 49.4       | 46.7<br>(44.1, 49.3) | 14.7       | 12.2<br>(10.9, 13.4) | 28.0         | 23.7<br>(21.7, 25.7) | 23.6           | 20.9<br>(18.7, 23.1) |
| Cuba<br>(N=1,897)                   | 1.4           | 1.9<br>(1.0, 2.7) | 32.5       | 37.2<br>(34.7, 39.8) | 5.9        | 8.0<br>(6.6, 9.5)    | 15.3         | 21.0<br>(18.4, 23.6) | 12.7           | 15.4<br>(12.1, 18.7) |
| P-values                            |               | 0.06              |            | <0.001               |            | <0.001               |              | <0.001               |                | <0.001               |
